# Supplementary material
Source: PubMed Central journal article supplement (PMC3993921)
Supplement: ic4025926_si_001.pdf [file ic4025926_si_001.pdf]

## SUPPLEMENTARY INFORMATION

Phosphinogold(I) dithiocarbamate complexes: effect of the nature of phosphine ligand on anticancer properties

Frankline K. Keter,<sup>a,d</sup> Ilia A. Guzei,<sup>b</sup> Margo Nell,<sup>c</sup> Werner E. van Zyl<sup>a, †</sup>, James Darkwa<sup>a\*</sup>

<sup>a</sup>Department of Chemistry, University of Johannesburg, P.O. Box 524 Auckland Park 2006, South Africa

<sup>b</sup>Department of Chemistry, University of Wisconsin-Madison, 1101 University Avenue, Madison, WI 53706, USA.

<sup>c</sup>Department of Pharmacology, University of Pretoria, Pretoria 0002, South Africa.

<sup>d</sup>Advanced Materials Division, Mintek, Private Bag X3015, Randburg 2125, South Africa

<sup>†</sup>Present Address: School of Chemistry and Physics, University of KwaZulu-Natal, Westville Campus, Private Bag X54001, Durban, 4000, South Africa.

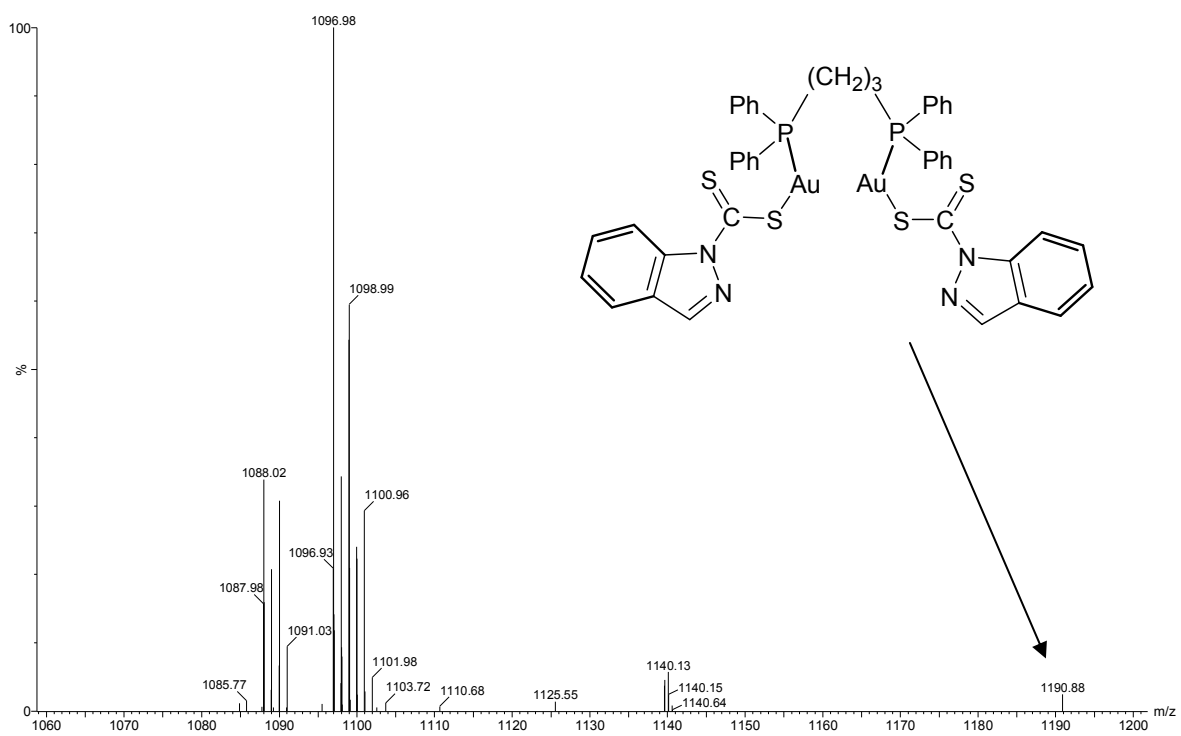

**Figure S1.** Time of flight ESI-MS spectrum of **9** ( $m/z = 1190.88$ )

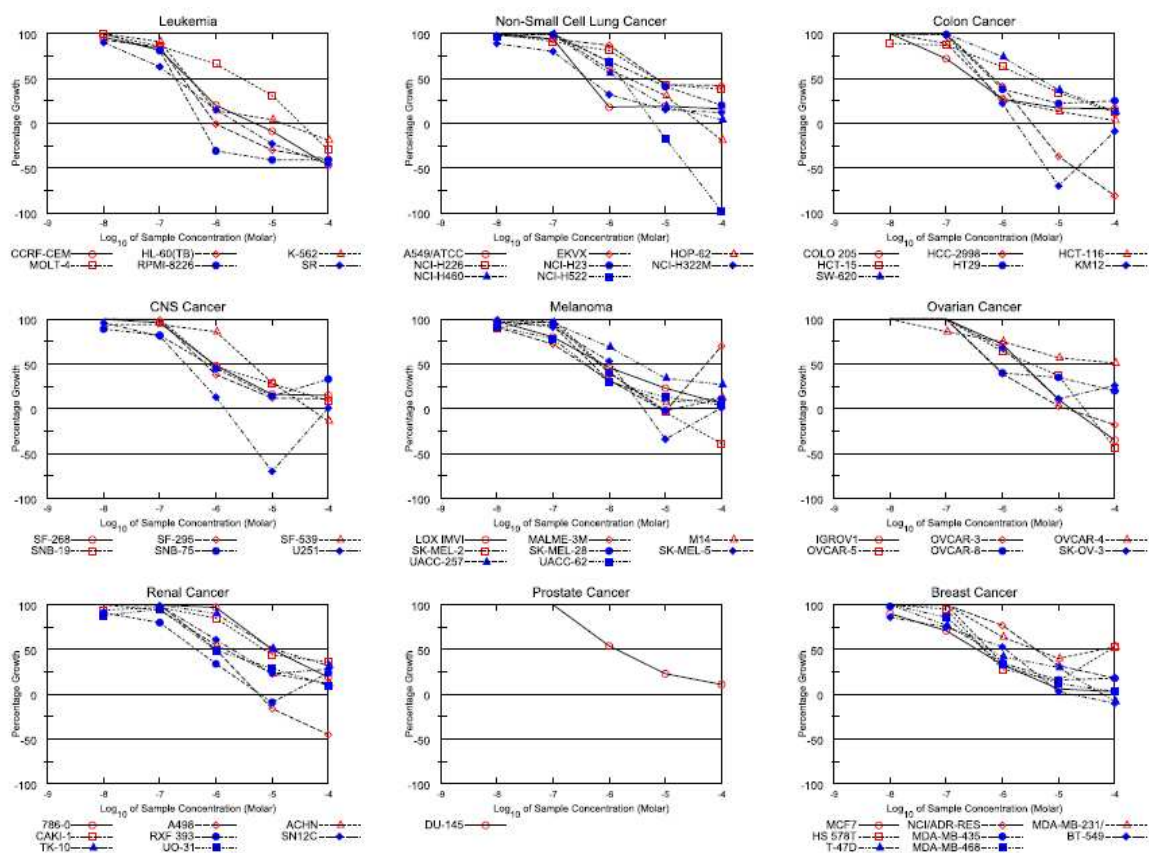

**Figure S2.** Data showing the anticancer action of compound 10. The data is generated from five-dose response experiments.

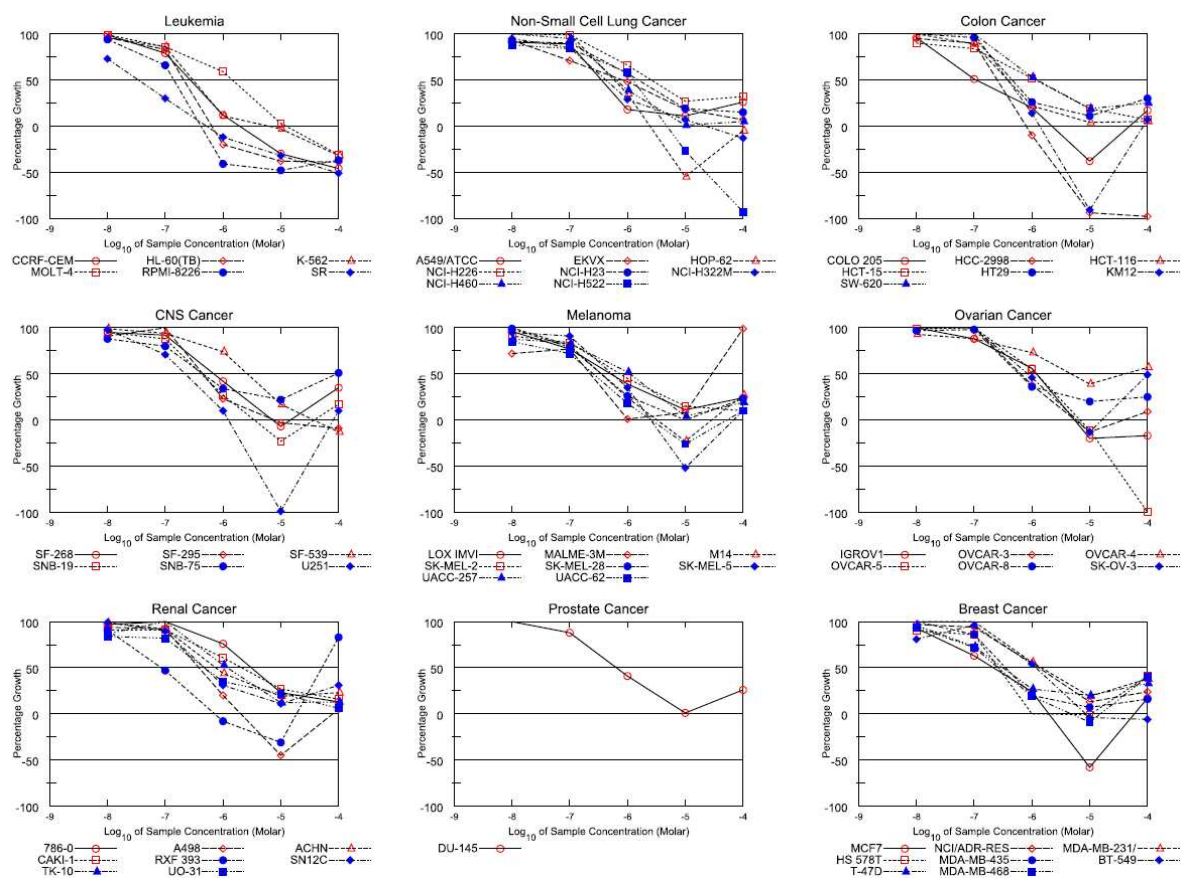

**Figure S3.** Data showing the anticancer action of compound 11. The data is generated from five-dose response experiments.

**Table S1.** Activity of compound 10 against a panel of a panel of 60 cancerous cell lines

| Panel/Cell line                   | GI <sub>50</sub><br>( $\mu$ M) | Log <sub>10</sub><br>GI <sub>50</sub> | TGI<br>( $\mu$ M) | Log <sub>10</sub><br>TGI | LC <sub>50</sub><br>( $\mu$ M) | Log <sub>10</sub><br>LC <sub>50</sub> |
|-----------------------------------|--------------------------------|---------------------------------------|-------------------|--------------------------|--------------------------------|---------------------------------------|
| <b>Leukemia</b>                   |                                |                                       |                   |                          |                                |                                       |
| CCRF-CEM                          | 3.27E-7                        | -6.49                                 | 4.99E-6           | -5.30                    | >1.00E-4                       | >-4.00                                |
| HL-60                             | 2.53E-7                        | -6.60                                 | 9.67E-7           | -6.01                    | >1.00E-4                       | >-4.00                                |
| K-562                             | 3.39E-7                        | -6.47                                 | 1.51E-5           | -4.82                    | >1.00E-4                       | >-4.00                                |
| MOLT-4                            | 2.84E-6                        | -5.55                                 | 3.23E-5           | -4.49                    | >1.00E-4                       | >-4.00                                |
| RPMI-8226                         | 1.88E-7                        | -6.73                                 | 5.26E-7           | -6.28                    | >1.00E-4                       | >-4.00                                |
| SR                                | 1.86E-7                        | -6.73                                 | 2.41E-6           | -5.62                    | >1.00E-4                       | >-4.00                                |
|                                   |                                |                                       |                   |                          |                                |                                       |
| <b>Non-small Cell Lung Cancer</b> |                                |                                       |                   |                          |                                |                                       |
| A549/ATCC                         | 3.82E-7                        | -6.42                                 | >1.00E-4          | >-4.00                   | >1.00E-4                       | >-4.00                                |
| EKVX                              | 6.98E-6                        | -5.16                                 | >1.00E-4          | >-4.00                   | >1.00E-4                       | >-4.00                                |
| HOP-62                            | 2.26E-6                        | -5.65                                 | 4.23E-5           | -4.37                    | >1.00E-4                       | >-4.00                                |
| NCI-H226                          | 6.63E-6                        | -5.18                                 | >1.00E-4          | >-4.00                   | >1.00E-4                       | >-4.00                                |
| NCI-H23                           | 4.76E-6                        | -5.32                                 | >1.00E-4          | >-4.00                   | >1.00E-4                       | >-4.00                                |
| NCI-H322M                         | 4.17E-7                        | -6.38                                 | >1.00E-4          | >-4.00                   | >1.00E-4                       | >-4.00                                |
| NCI-H460                          | 1.43E-6                        | -5.85                                 | >1.00E-4          | >-4.00                   | >1.00E-4                       | >-4.00                                |
| NCI-H522                          | 1.62E-6                        | -5.79                                 | 6.33E-6           | -5.20                    | 2.56E-5                        | -4.59                                 |
|                                   |                                |                                       |                   |                          |                                |                                       |
| <b>Colon Cancer</b>               |                                |                                       |                   |                          |                                |                                       |
| COLO 205                          | 3.08E-7                        | -6.51                                 | >1.00E-4          | >-4.00                   | >1.00E-4                       | >-4.00                                |
| HCC-2998                          | 7.59E-7                        | -6.12                                 | 3.34E-6           | -5.48                    | 1.94E-5                        | -4.71                                 |
| HCT-116                           | 4.20E-7                        | -6.38                                 | >1.00E-4          | >-4.00                   | >1.00E-4                       | >-4.00                                |

| <b>Panel/Cell line</b> | <b>GI<sub>50</sub><br/>(<math>\mu</math>M)</b> | <b>Log<sub>10</sub><br/>GI<sub>50</sub></b> | <b>TGI<br/>(<math>\mu</math>M)</b> | <b>Log<sub>10</sub><br/>TGI</b> | <b>LC<sub>50</sub><br/>(<math>\mu</math>M)</b> | <b>Log<sub>10</sub><br/>LC<sub>50</sub></b> |
|------------------------|------------------------------------------------|---------------------------------------------|------------------------------------|---------------------------------|------------------------------------------------|---------------------------------------------|
| HCT-15                 | 2.88E-6                                        | -5.54                                       | >1.00E-4                           | >-4.00                          | >1.00E-4                                       | >-4.00                                      |
| HT29                   | 6.42E-7                                        | -6.19                                       | >1.00E-4                           | >-4.00                          | >1.00E-4                                       | >-4.00                                      |
| KM12                   | 4.34E-7                                        | -6.36                                       | 1.73E-6                            | -5.76                           | -                                              | -                                           |
| SW620                  | 4.49E-6                                        | -5.35                                       | >1.00E-4                           | >-4.00                          | >1.00E-4                                       | >-4.00                                      |
|                        |                                                |                                             |                                    |                                 |                                                |                                             |
| <b>CNS Cancer</b>      |                                                |                                             |                                    |                                 |                                                |                                             |
| SF-268                 | 9.20E-7                                        | -6.04                                       | >1.00E-4                           | >-4.00                          | >1.00E-4                                       | >-4.00                                      |
| SF-295                 | 6.36E-7                                        | -6.20                                       | >1.00E-4                           | >-4.00                          | >1.00E-4                                       | >-4.00                                      |
| SF-539                 | 4.32E-6                                        | -5.36                                       | 4.81E-5                            | -4.32                           | >1.00E-4                                       | >-4.00                                      |
| SNB-19                 | 8.79E-7                                        | -6.06                                       | >1.00E-4                           | >-4.00                          | >1.00E-4                                       | >-4.00                                      |
| SNB-75                 | 7.17E-7                                        | -6.14                                       | >1.00E-4                           | >-4.00                          | >1.00E-4                                       | >-4.00                                      |
| U251                   | 2.88E-7                                        | -6.54                                       | -                                  | -                               | -                                              | -                                           |
|                        |                                                |                                             |                                    |                                 |                                                |                                             |
| <b>Melanoma</b>        |                                                |                                             |                                    |                                 |                                                |                                             |
| LOXIMVI                | 7.44E-7                                        | -6.13                                       | >1.00E-4                           | >-4.00                          | >1.00E-4                                       | >-4.00                                      |
| MALME-3M               | -                                              | -                                           | -                                  | -                               | >1.00E-4                                       | >-4.00                                      |
| M14                    | 4.87E-7                                        | -6.31                                       | >1.00E-4                           | >-4.00                          | >1.00E-4                                       | >-4.00                                      |
| SK-MEL-2               | 7.32E-7                                        | -6.14                                       | 8.17E-6                            | -5.09                           | >1.00E-4                                       | >-4.00                                      |
| SK-MEL-28              | 6.69E-7                                        | -6.17                                       | -                                  | -                               | >1.00E-4                                       | >-4.00                                      |
| SK-MEL-5               | 1.08E-6                                        | -5.97                                       | -                                  | -                               | >1.00E-4                                       | >-4.00                                      |
| UACC-257               | 3.57E-6                                        | -5.45                                       | >1.00E-4                           | >-4.00                          | >1.00E-4                                       | >-4.00                                      |
| UACC-62                | 3.83E-7                                        | -6.42                                       | >1.00E-4                           | >-4.00                          | >1.00E-4                                       | >-4.00                                      |
|                        |                                                |                                             |                                    |                                 |                                                |                                             |
| <b>Ovarian Cancer</b>  |                                                |                                             |                                    |                                 |                                                |                                             |

| <b>Panel/Cell line</b> | <b>GI<sub>50</sub><br/>(<math>\mu</math>M)</b> | <b>Log<sub>10</sub><br/>GI<sub>50</sub></b> | <b>TGI<br/>(<math>\mu</math>M)</b> | <b>Log<sub>10</sub><br/>TGI</b> | <b>LC<sub>50</sub><br/>(<math>\mu</math>M)</b> | <b>Log<sub>10</sub><br/>LC<sub>50</sub></b> |
|------------------------|------------------------------------------------|---------------------------------------------|------------------------------------|---------------------------------|------------------------------------------------|---------------------------------------------|
| IGROV1                 | 2.26E-6                                        | -5.65                                       | 1.71E-5                            | -4.77                           | >1.00E-4                                       | >-4.00                                      |
| OVCAR-3                | 7.00E-7                                        | -6.15                                       | 1.42E-5                            | -4.85                           | >1.00E-4                                       | >-4.00                                      |
| OVCAR-4                | >1.00E-4                                       | >-4.00                                      | >1.00E-4                           | >-4.00                          | >1.00E-4                                       | >-4.00                                      |
| OVCAR-5                | 3.63E-6                                        | -5.47                                       | 2.89E-5                            | -4.54                           | >1.00E-4                                       | >-4.00                                      |
| OVCAR-8                | 6.96E-7                                        | -6.16                                       | >1.00E-4                           | >-4.00                          | >1.00E-4                                       | >-4.00                                      |
| SK-OV-3                | 2.06E-6                                        | -5.69                                       | >1.00E-4                           | >-4.00                          | >1.00E-4                                       | >-4.00                                      |
|                        |                                                |                                             |                                    |                                 |                                                |                                             |
| <b>Renal Cancer</b>    |                                                |                                             |                                    |                                 |                                                |                                             |
| 786-O                  | 9.80E-6                                        | -5.01                                       | >1.00E-4                           | >-4.00                          | >1.00E-4                                       | >-4.00                                      |
| A498                   | 1.01E-6                                        | -5.99                                       | 5.73E-6                            | -5.24                           | >1.00E-4                                       | >-4.00                                      |
| ACHN                   | 1.45E-6                                        | -5.84                                       | >1.00E-4                           | >-4.00                          | >1.00E-4                                       | >-4.00                                      |
| CAKI-1                 | 7.15E-6                                        | -5.15                                       | >1.00E-4                           | >-4.00                          | >1.00E-4                                       | >-4.00                                      |
| RXF393                 | 4.54E-7                                        | -6.34                                       | -                                  | -                               | >1.00E-4                                       | >-4.00                                      |
| SN12C                  | 1.95E-6                                        | -5.71                                       | >1.00E-4                           | >-4.00                          | >1.00E-4                                       | >-4.00                                      |
| TK-10                  | 1.10E-5                                        | -4.96                                       | >1.00E-4                           | >-4.00                          | >1.00E-4                                       | >-4.00                                      |
| UO-31                  | 9.33E-7                                        | -6.03                                       | >1.00E-4                           | >-4.00                          | >1.00E-4                                       | >-4.00                                      |
|                        |                                                |                                             |                                    |                                 |                                                |                                             |
| <b>Prostate Cancer</b> |                                                |                                             |                                    |                                 |                                                |                                             |
| DU-145                 | 1.31E-6                                        | -5.88                                       | >1.00E-4                           | >-4.00                          | >1.00E-4                                       | >-4.00                                      |
|                        |                                                |                                             |                                    |                                 |                                                |                                             |
| <b>Breast Cancer</b>   |                                                |                                             |                                    |                                 |                                                |                                             |
| MCF-7                  | 3.56E-7                                        | -6.45                                       | >1.00E-4                           | >-4.00                          | >1.00E-4                                       | >-4.00                                      |
| NCI/ADR-RES            | 3.99E-6                                        | -5.40                                       | >1.00E-4                           | >-4.00                          | >1.00E-4                                       | >-4.00                                      |

| Panel/Cell line | GI <sub>50</sub><br>( $\mu$ M) | Log <sub>10</sub><br>GI <sub>50</sub> | TGI<br>( $\mu$ M) | Log <sub>10</sub><br>TGI | LC <sub>50</sub><br>( $\mu$ M) | Log <sub>10</sub><br>LC <sub>50</sub> |
|-----------------|--------------------------------|---------------------------------------|-------------------|--------------------------|--------------------------------|---------------------------------------|
| MDA-MB-231/ATCC | -                              | -                                     | >1.00E-4          | >-4.00                   | >1.00E-4                       | >-4.00                                |
| HS 578T         | -                              | -                                     | >1.00E-4          | >-4.00                   | >1.00E-4                       | >-4.00                                |
| MDA-MB-435      | 5.95E-7                        | -6.23                                 | >1.00E-4          | >-4.00                   | >1.00E-4                       | >-4.00                                |
| BT-549          | 1.12E-6                        | -5.95                                 | 1.65E-5           | -4.78                    | >1.00E-4                       | >-4.00                                |
| T-47D           | 5.93E-7                        | -6.23                                 | 6.19E-5           | -4.21                    | >1.00E-4                       | >-4.00                                |
| MDA-MB-468      | 4.82E-7                        | -6.32                                 | >1.00E-4          | >-4.00                   | >1.00E-4                       | >-4.00                                |

**Table S2.** Activity of compound **11** against a panel of a panel of 60 cancerous cell lines

| Panel/Cell line                   | GI <sub>50</sub><br>( $\mu$ M) | Log <sub>10</sub><br>GI <sub>50</sub> | TGI<br>( $\mu$ M) | Log <sub>10</sub><br>TGI | LC <sub>50</sub><br>( $\mu$ M) | Log <sub>10</sub><br>LC <sub>50</sub> |
|-----------------------------------|--------------------------------|---------------------------------------|-------------------|--------------------------|--------------------------------|---------------------------------------|
| <b>Leukemia</b>                   |                                |                                       |                   |                          |                                |                                       |
| CCRF-CEM                          | 2.66E-7                        | -6.57                                 | 1.89E-6           | -5.72                    | >1.00E-4                       | >-4.00                                |
| HL-60                             | 2.11E-7                        | -6.68                                 | 6.44E-7           | -6.19                    | >1.00E-4                       | >-4.00                                |
| K-562                             | 3.01E-7                        | -6.52                                 | 5.76E-6           | -5.24                    | >1.00E-4                       | >-4.00                                |
| MOLT-4                            | 1.42E-6                        | -5.85                                 | 1.20E-5           | -4.92                    | >1.00E-4                       | >-4.00                                |
| RPMI-8226                         | 1.40E-7                        | -6.85                                 | 4.13E-7           | -6.38                    | >1.00E-4                       | >-4.00                                |
| SR                                | 3.41E-8                        | -7.47                                 | 5.21E-7           | -6.28                    | 9.00E-5                        | -4.05                                 |
|                                   |                                |                                       |                   |                          |                                |                                       |
| <b>Non-small Cell Lung Cancer</b> |                                |                                       |                   |                          |                                |                                       |
| A549/ATCC                         | 3.51E-7                        | -6.45                                 | >1.00E-4          | >-4.00                   | >1.00E-4                       | >-4.00                                |
| EKVX                              | 7.92E-7                        | -6.10                                 | >1.00E-4          | >-4.00                   | >1.00E-4                       | >-4.00                                |
| HOP-62                            | 6.52E-7                        | -6.19                                 | 2.45E-6           | -5.61                    | -                              | -                                     |



| <b>Panel/Cell line</b> | <b>GI<sub>50</sub><br/>(μM)</b> | <b>Log<sub>10</sub><br/>GI<sub>50</sub></b> | <b>TGI<br/>(μM)</b> | <b>Log<sub>10</sub><br/>TGI</b> | <b>LC<sub>50</sub><br/>(μM)</b> | <b>Log<sub>10</sub><br/>LC<sub>50</sub></b> |
|------------------------|---------------------------------|---------------------------------------------|---------------------|---------------------------------|---------------------------------|---------------------------------------------|
| NCI-H226               | 2.52E-6                         | -5.60                                       | >1.00E-4            | >-4.00                          | >1.00E-4                        | >-4.00                                      |
| NCI-H23                | 1.54E-6                         | -5.81                                       | >1.00E-4            | >-4.00                          | >1.00E-4                        | >-4.00                                      |
| NCI-H322M              | 4.23E-7                         | -6.37                                       | 2.24E-5             | -4.65                           | >1.00E-4                        | >-4.00                                      |
| NCI-H460               | 6.38E-7                         | -6.20                                       | >1.00E-4            | >-4.00                          | >1.00E-4                        | >-4.00                                      |
| NCI-H522               | 1.24E-6                         | -5.91                                       | 4.80E-6             | -5.32                           | 2.23E-5                         | -4.65                                       |
|                        |                                 |                                             |                     |                                 |                                 |                                             |
| <b>Colon Cancer</b>    |                                 |                                             |                     |                                 |                                 |                                             |
| COLO 205               | 1.05E-7                         | -6.98                                       | -                   | -                               | >1.00E-4                        | >-4.00                                      |
| HCC-2998               | 2.52E-7                         | -6.60                                       | 7.99E-7             | -6.10                           | 2.99E-6                         | -5.52                                       |
| HCT-116                | 3.80E-7                         | -6.42                                       | >1.00E-4            | >-4.00                          | >1.00E-4                        | >-4.00                                      |
| HCT-15                 | 1.12E-6                         | -5.95                                       | >1.00E-4            | >-4.00                          | >1.00E-4                        | >-4.00                                      |
| HT29                   | 4.58E-7                         | -6.34                                       | >1.00E-4            | >-4.00                          | >1.00E-4                        | >-4.00                                      |
| KM12                   | 3.86E-7                         | -6.41                                       | -                   | -                               | -                               | -                                           |
| SW620                  | 1.26E-6                         | -5.90                                       | >1.00E-4            | >-4.00                          | >1.00E-4                        | >-4.00                                      |
|                        |                                 |                                             |                     |                                 |                                 |                                             |
| <b>CNS Cancer</b>      |                                 |                                             |                     |                                 |                                 |                                             |
| SF-268                 | 6.80E-7                         | -6.17                                       | -                   | -                               | >1.00E-4                        | >-4.00                                      |
| SF-295                 | 4.62E-7                         | -6.34                                       | 7.70E-6             | -5.11                           | >1.00E-4                        | >-4.00                                      |
| SF-539                 | 2.64E-6                         | -5.58                                       | 3.64E-5             | -4.44                           | >1.00E-4                        | >-4.00                                      |
| SNB-19                 | 4.17E-7                         | -6.38                                       | -                   | -                               | >1.00E-4                        | >-4.00                                      |
| SNB-75                 | -                               | -                                           | >1.00E-4            | >-4.00                          | >1.00E-4                        | >-4.00                                      |
| U251                   | 2.20E-7                         | -6.66                                       | -                   | -                               | -                               | -                                           |
|                        |                                 |                                             |                     |                                 |                                 |                                             |
| <b>Melanoma</b>        |                                 |                                             |                     |                                 |                                 |                                             |

| <b>Panel/Cell line</b> | <b>GI<sub>50</sub><br/>(<math>\mu</math>M)</b> | <b>Log<sub>10</sub><br/>GI<sub>50</sub></b> | <b>TGI<br/>(<math>\mu</math>M)</b> | <b>Log<sub>10</sub><br/>TGI</b> | <b>LC<sub>50</sub><br/>(<math>\mu</math>M)</b> | <b>Log<sub>10</sub><br/>LC<sub>50</sub></b> |
|------------------------|------------------------------------------------|---------------------------------------------|------------------------------------|---------------------------------|------------------------------------------------|---------------------------------------------|
| LOXIMVI                | 5.26E-7                                        | -6.28                                       | >1.00E-4                           | >-4.00                          | >1.00E-4                                       | >-4.00                                      |
| MALME-3M               | -                                              | -                                           | >1.00E-4                           | >-4.00                          | >1.00E-4                                       | >-4.00                                      |
| M14                    | 3.52E-7                                        | -6.45                                       | -                                  | -                               | >1.00E-4                                       | >-4.00                                      |
| SK-MEL-2               | 7.27E-7                                        | -6.14                                       | >1.00E-4                           | >-4.00                          | >1.00E-4                                       | >-4.00                                      |
| SK-MEL-28              | 3.56E-7                                        | -6.45                                       | -                                  | -                               | >1.00E-4                                       | >-4.00                                      |
| SK-MEL-5               | 5.41E-7                                        | -6.27                                       | -                                  | -                               | -                                              | -                                           |
| UACC-257               | 1.11E-6                                        | -5.96                                       | >1.00E-4                           | >-4.00                          | >1.00E-4                                       | >-4.00                                      |
| UACC-62                | 2.54E-7                                        | -6.59                                       | -                                  | -                               | >1.00E-4                                       | >-4.00                                      |
|                        |                                                |                                             |                                    |                                 |                                                |                                             |
| <b>Ovarian Cancer</b>  |                                                |                                             |                                    |                                 |                                                |                                             |
| IGROV1                 | 1.19E-6                                        | -5.92                                       | 5.42E-6                            | -5.27                           | >1.00E-4                                       | >-4.00                                      |
| OVCAR-3                | 6.48E-7                                        | -6.19                                       | -                                  | -                               | >1.00E-4                                       | >-4.00                                      |
| OVCAR-4                | -                                              | -                                           | >1.00E-4                           | >-4.00                          | >1.00E-4                                       | >-4.00                                      |
| OVCAR-5                | 1.21E-6                                        | -5.92                                       | 6.79E-6                            | -5.17                           | 2.74E-5                                        | -4.56                                       |
| OVCAR-8                | 5.97E-7                                        | -6.22                                       | >1.00E-4                           | >-4.00                          | >1.00E-4                                       | >-4.00                                      |
| SK-OV-3                | 8.52E-7                                        | -6.07                                       | -                                  | -                               | >1.00E-4                                       | >-4.00                                      |
|                        |                                                |                                             |                                    |                                 |                                                |                                             |
| <b>Renal Cancer</b>    |                                                |                                             |                                    |                                 |                                                |                                             |
| 786-O                  | 3.10E-6                                        | -5.51                                       | >1.00E-4                           | >-4.00                          | >1.00E-4                                       | >-4.00                                      |
| A498                   | 3.84E-7                                        | -6.42                                       | -                                  |                                 | >1.00E-4                                       | >-4.00                                      |
| ACHN                   | 7.52E-7                                        | -6.12                                       | >1.00E-4                           | >-4.00                          | >1.00E-4                                       | >-4.00                                      |
| CAKI-1                 | 2.16E-6                                        | -5.66                                       | >1.00E-4                           | >-4.00                          | >1.00E-4                                       | >-4.00                                      |
| RXF393                 | -                                              | -                                           | -                                  | -                               | -                                              | -                                           |
| SN12C                  | 4.79E-7                                        | -6.32                                       | >1.00E-4                           | >-4.00                          | >1.00E-4                                       | >-4.00                                      |

| <b>Panel/Cell line</b> | <b>GI<sub>50</sub><br/>(μM)</b> | <b>Log<sub>10</sub><br/>GI<sub>50</sub></b> | <b>TGI<br/>(μM)</b> | <b>Log<sub>10</sub><br/>TGI</b> | <b>LC<sub>50</sub><br/>(μM)</b> | <b>Log<sub>10</sub><br/>LC<sub>50</sub></b> |
|------------------------|---------------------------------|---------------------------------------------|---------------------|---------------------------------|---------------------------------|---------------------------------------------|
| TK-10                  | 1.21E-6                         | -5.92                                       | >1.00E-4            | >-4.00                          | >1.00E-4                        | >-4.00                                      |
| UO-31                  | 4.82E-7                         | -6.32                                       | >1.00E-4            | >-4.00                          | >1.00E-4                        | >-4.00                                      |
|                        |                                 |                                             |                     |                                 |                                 |                                             |
| <b>Prostate Cancer</b> |                                 |                                             |                     |                                 |                                 |                                             |
| DU-145                 | 6.33E-7                         | -6.20                                       | >1.00E-4            | >-4.00                          | >1.00E-4                        | >-4.00                                      |
|                        |                                 |                                             |                     |                                 |                                 |                                             |
| <b>Breast Cancer</b>   |                                 |                                             |                     |                                 |                                 |                                             |
| MCF-7                  | 2.13E-7                         | -6.67                                       | -                   | -                               | -                               | -                                           |
| NCI/ADR-RES            | 1.30E-6                         | -5.88                                       | >1.00E-4            | >-4.00                          | >1.00E-4                        | >-4.00                                      |
| MDA-MB-231/ATCC        | 1.42E-6                         | -5.85                                       | >1.00E-4            | >-4.00                          | >1.00E-4                        | >-4.00                                      |
| HS 578T                | 2.63E-7                         | -6.58                                       | -                   | -                               | >1.00E-4                        | >-4.00                                      |
| MDA-MB-435             | 3.50E-7                         | -6.46                                       | >1.00E-4            | >-4.00                          | >1.00E-4                        | >-4.00                                      |
| BT-549                 | 1.18E-6                         | -5.93                                       | 8.44E-6             | -5.07                           | >1.00E-4                        | >-4.00                                      |
| T-47D                  | 3.14E-7                         | -6.50                                       | >1.00E-4            | >-4.00                          | >1.00E-4                        | >-4.00                                      |
| MDA-MB-468             | 2.62E-7                         | -6.58                                       | -                   | -                               | >1.00E-4                        | >-4.00                                      |
